# Supplementary material
Source: PubMed Central journal article supplement (PMC2862971)
Supplement: NIHMS182255-supplement-1_si_001.pdf [file NIHMS182255-supplement-1_si_001.pdf]

# Supporting Information

## Challenging the Limit: NMR Assignment of a 31 kDa Helical Membrane Protein

Chengdong Huang, and Smita Mohanty\*

*Department of Chemistry and Biochemistry, Auburn University, Auburn, Alabama*

36849

Contact Information: Smita Mohanty, mohansm@auburn.edu

### Table of Content

|                            |       |
|----------------------------|-------|
| Experimental Details ..... | S2-S4 |
| References .....           | S4    |
| Figure S1.....             | S5    |
| Figure S2.....             | S6    |
| Figure S3.....             | S7    |
| Figure S4.....             | S8    |

## **Experimental details**

### **Overexpression and purification of $^2\text{H}$ , $^{13}\text{C}$ , $^{15}\text{N}$ -labeled C-terminal domain of Stt3p**

Recombinant uniformly triple labeled ( $^2\text{H}$ ,  $^{13}\text{C}$ ,  $^{15}\text{N}$ -labeled) C-terminal domain of Stt3p was expressed in *E. coli* BL21 (DE3) codon plus cells using pET-28c vector that contained an IPTG-inducible gene for the protein containing an N-terminal hexa-histidine tag. The transformed cells were grown in 3 mL of LB medium at 37 °C for 3 h, then transferred to 12.5 mL of unlabeled minimal M9/H<sub>2</sub>O medium, and grown until an OD<sub>600</sub> of ~ 0.5. The cells were then separated from the medium by centrifugation at 3,000 rpm for 15 minutes and transferred to 50 mL of M9/D<sub>2</sub>O culture containing 0.12% (m/v) of  $^{15}\text{NH}_4\text{Cl}$  as the sole nitrogen source and 0.4% (m/v) of  $^{13}\text{C}$ -labeled glucose as the sole carbon source. At OD<sub>600</sub> ≈ 0.5, the culture was diluted to 300 mL with M9/D<sub>2</sub>O. The expression of the His-tagged protein was induced at OD<sub>600</sub> ~ 0.4 with 0.5 mM IPTG, and the culture was allowed to grow for an additional 11-12 h at 30 °C (final OD<sub>600</sub> ~ 2.0). The cells were harvested by centrifugation. The cell pellet was passed through 4 cycles of freeze-thaw using liquid nitrogen and ice respectively and resuspended in B-PER solution (Pierce). The cells were then lysed by sonication (10 × 15 s) and the supernatant was removed after centrifugation at 10,000 × g for 30 min. The pellet was resuspended once with 10% B-PER solution, sonicated and centrifuged again as above. The inclusion bodies were stored at -20 °C until needed.

The purification of the triple labeled recombinant protein was carried out as reported recently.<sup>1</sup>

### **NMR samples and data collection**

NMR samples contain 25 mM sodium phosphate buffer (pH 6.5), 1% (v/v) glycerol, 100 mM sodium dodecyl-d25 sulfate (SDS, Sigma-Aldrich), 1 mM EDTA, 10% D<sub>2</sub>O. Protein concentration

was ~ 0.6 mM. Higher concentration of protein led to deterioration of spectral quality, presumably due to protein aggregation.

TROSY-based HNCA, HNCOC, HN(CO)CA, HN(CA)CO, HNCACB, and CT- HN(CO)CACB were collected on a Bruker Avance 600-MHz spectrometer fitted with a triple resonance  $^1\text{H}/^{13}\text{C}/^{15}\text{N}$  TCI cryoprobe equipped with z-axis pulsed field gradients in the Department of Chemistry and Biochemistry, Auburn University. Moreover, TROSY-based HN(CA)CB and HN(CA)CO were also collected on a Varian Inova 900-MHz NMR spectrometer equipped with a triple resonance cold probe at the Southeast Collaboratory for High-Field Biomolecular NMR, a research resource at the University of Georgia.

### **NMR data processing and analysis**

All NMR spectra were processed and analyzed using NMRPipe<sup>2</sup> and NMRView software.<sup>3</sup> Nearly complete NMR assignment of  $^1\text{H}$ ,  $^{13}\text{C}$ , and  $^{15}\text{N}$  backbone resonances (255 out of 274 residues) was achieved for the C-terminal domain of Stt3p with the exception of 19 residues including 11 N-terminal residues located near the hexa-histidine tag (M1-H9 and S19-H20) and eight other residues (L561, K562, I584, N585, I591, P559, P661 and S702). Residue P661 cannot be assigned because the residue 662 is also a proline. We observed that the N-terminal residues around the hexa-histidine tag are very weak and broad similar to what has been seen for other proteins (BMRB accession# 5833).<sup>4</sup> The unassigned residues could not be detected probably due to local exchange-induced line-broadening.

## References

- (1) Huang, C.; Mohanty, S.; Banerjee, M. *Biochemistry*. **2010**, *49*, 1115-1126.
- (2) Delaglio, F.; Grzesiek, S.; Vuister, G. W.; Zhu, G.; Pfeifer, J.; Bax, A. *J. Biomol. NMR*. **1995**, *6*, 277-293.
- (3) Johnson, B. A.; Blevins J. *J. Biomol. NMR*. **1994**, *4*, 603-614.
- (4) Ponchon, L.; Dumas, C.; Fesquet, D.; Padilla, A. *J. Biomol. NMR.*, **2004**, *28*, 299-300

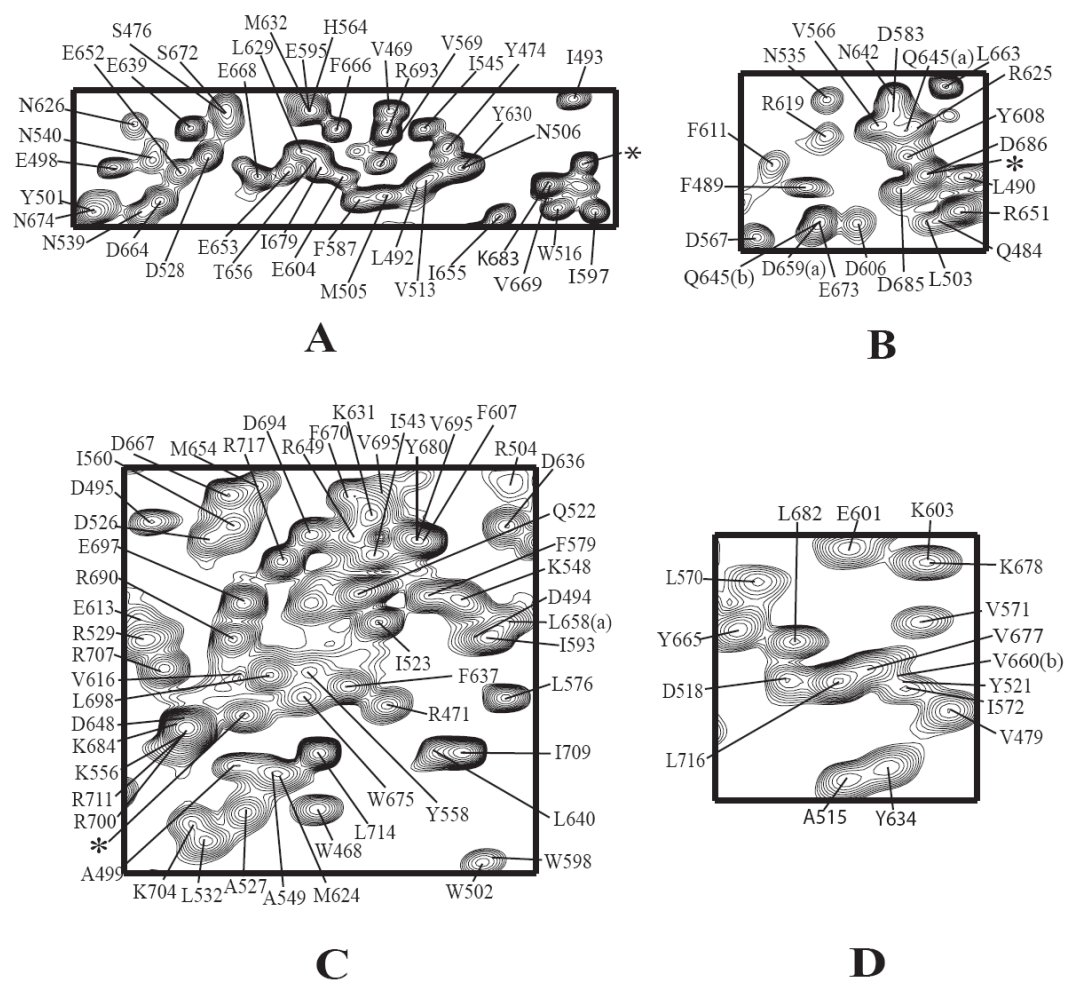

**Figure S1.** Four regions, labeled as A, B, C and D, of the  $^{15}\text{N}$ - $^1\text{H}$ N TROSY-HSQC spectrum (Figure 1 in the main text) of U- $\{^{15}\text{N}, ^{13}\text{C}, ^2\text{H}\}$ -labeled C-terminal domain of Stt3p are expanded and peaks are labeled with residue numbers.

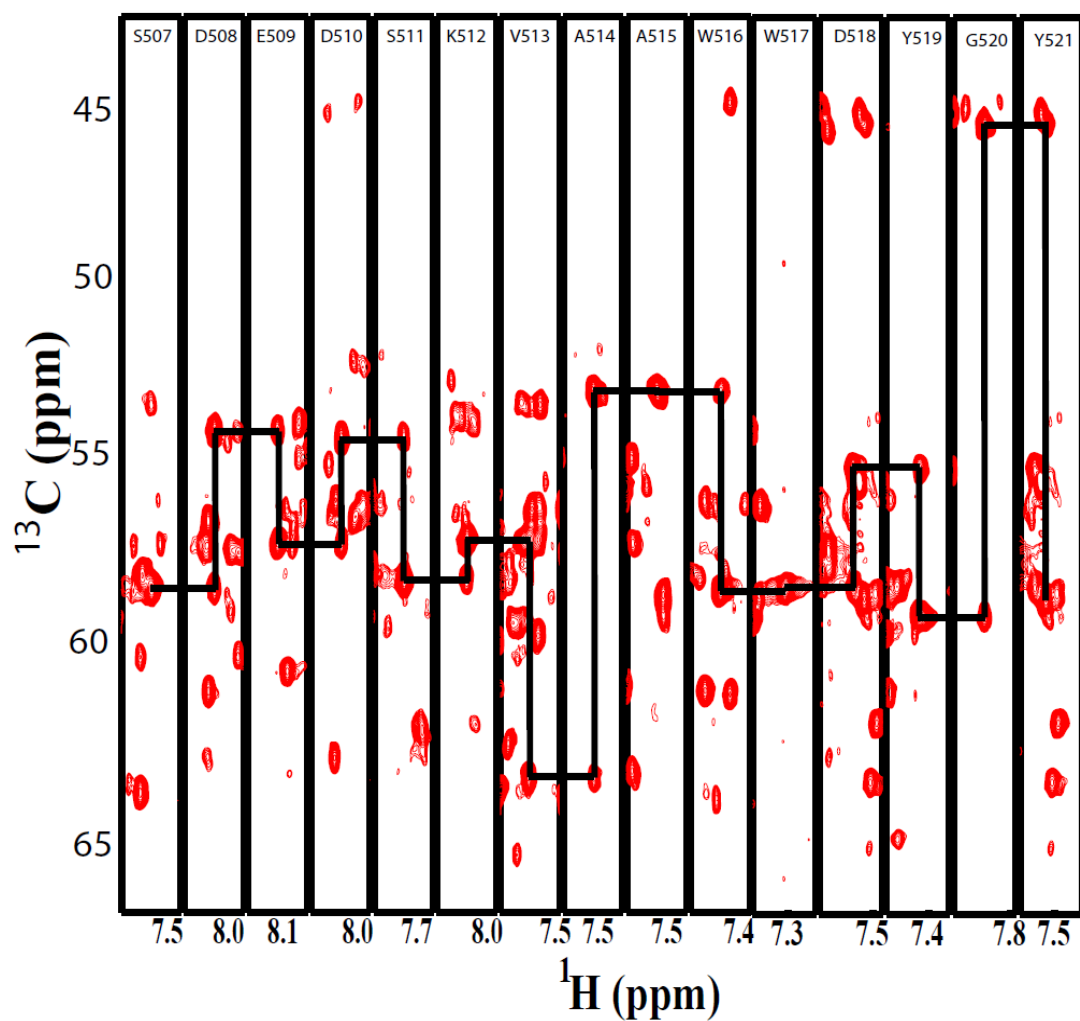

**Figure S2.** [ $^1\text{H}$ ,  $^{13}\text{C}$ ]-strips for residue S<sup>507</sup>-Y<sup>521</sup> from 3D HNCA spectrum of U- $\{^{15}\text{N}$ ,  $^{13}\text{C}$ ,  $^2\text{H}\}$ -labeled C-terminal domain of Stt3p showing sequential assignment. Residues are labeled and numbered on the top of each strip.

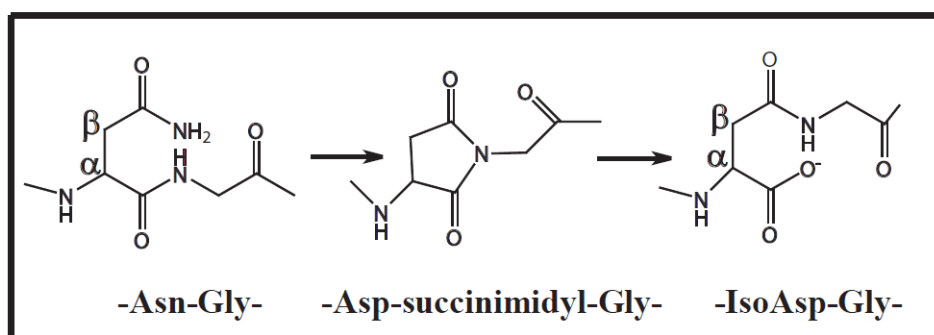

(A)

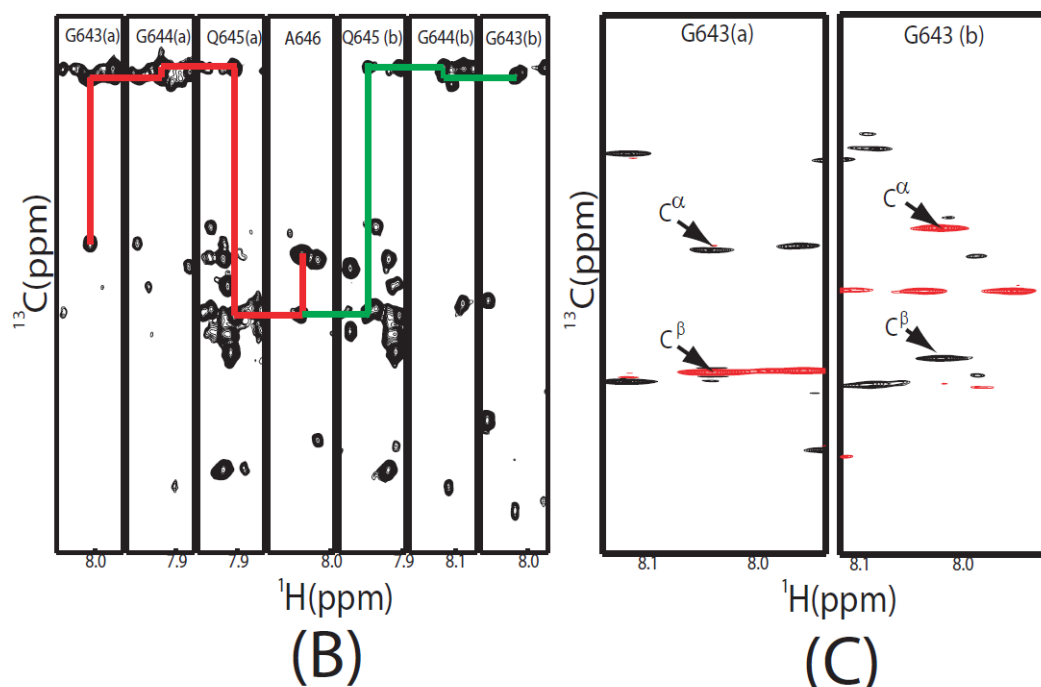

(B)

(C)

**Figure S3.** (A) The deamidation of the N<sup>642</sup> side chain resulting in the isoasparaginyl linkage between the N<sup>642</sup>-G<sup>643</sup> pair. (B) Two sets of HNCA spectrum strip plots of assignments for residues G<sup>643</sup>-Q<sup>645</sup> (shown as red and green line connectivity respectively). These two sets of assignment correspond to the residues following the -Asn-Gly- (residues connected by red lines) and -IsoAsp-Gly- linkages (residues connected by green lines) respectively. (C) CT-HN(CO)CACB strip plot of the two assigned G<sup>643</sup> residue. Negative peaks are shown in red while positive peaks are shown in black. Note in the left strip, the negative sign of C<sup>α</sup> and positive sign of C<sup>β</sup> for residue N<sup>642</sup> are unambiguously indicative of -IsoAsp-Gly- linkage between the N<sup>642</sup>-G<sup>643</sup> pair; while the right strip demonstrate a normal -Asn-Gly- linkage (positive sign for C<sup>α</sup> and negative sign for C<sup>β</sup>).

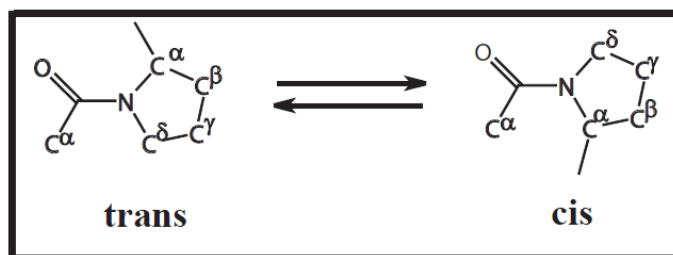

(A)

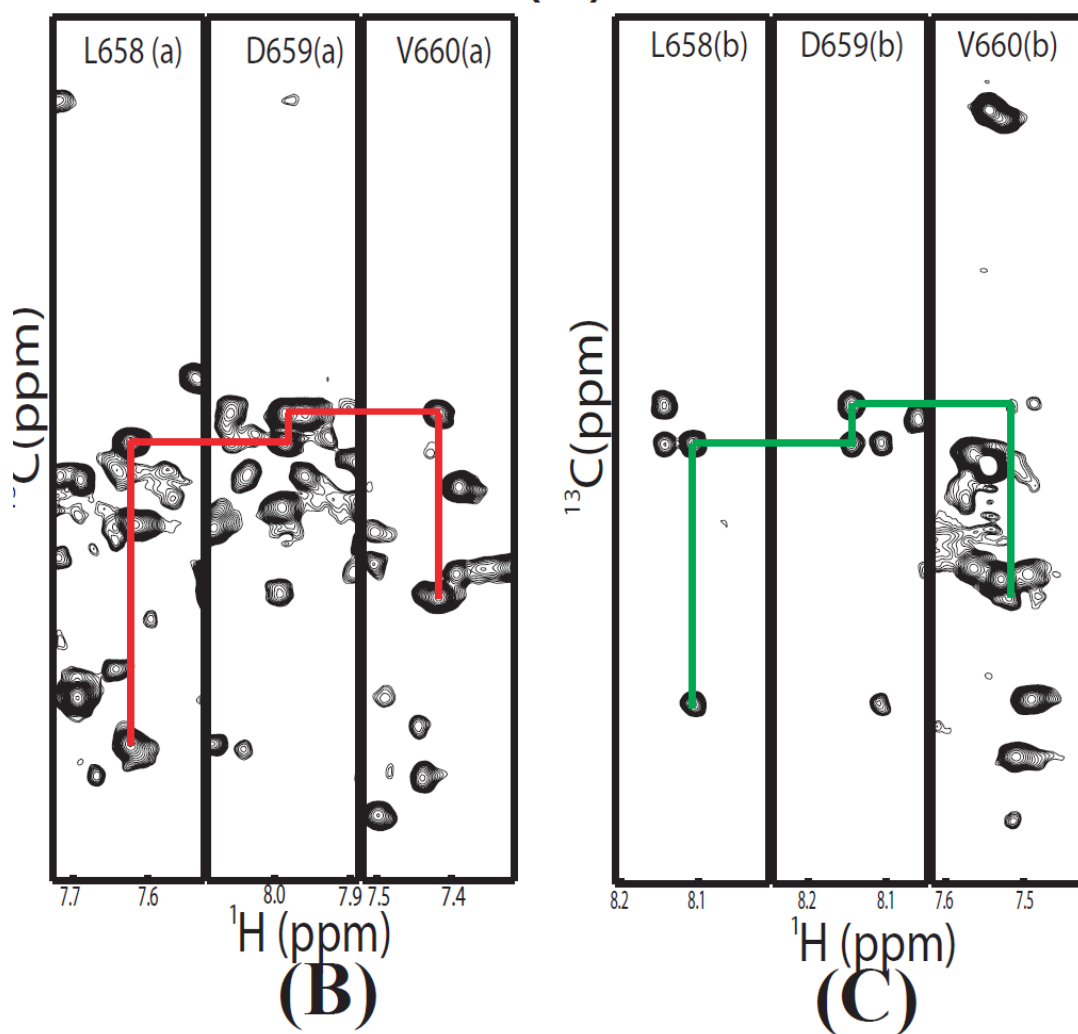

**Figure S4.** Identification of proline trans/cis isomerizational linkage in the C-terminal domain of Stt3p. (A) proline trans/cis isomerization. (B) and (C) are two sets of HNCA spectrum strip plots of assignments for residues L<sup>658</sup>-V<sup>660</sup>, indicating peptide bond V<sup>660</sup>-P<sup>661</sup> adopts both trans and cis isomers.
